# Supplementary material for: A Novel CDC25B Promoter–Based Oncolytic Adenovirus Inhibited Growth of Orthotopic Human Pancreatic Tumors in Different Preclinical Models
Source: Oxford University Press journal article supplement (doi:10.1158/1078-0432.ccr-14-2316), 2015-01-08
Supplement: 10780432ccr142316-sup-137501_1_supp_2780746_ngfcbm.doc [file 10780432ccr142316-sup-137501_1_supp_2780746_ngfcbm.doc]

**Supplementary Table S1 Weber et al**

**Table S1. *CDC25B* gene expression in different cell types**

| **Cell Line** | **Source** | **aRelative Expression** |
| --- | --- | --- |
| BxPC3 | Pancreatic cancer | 6.13 ± 0.94 |
| MIA PaCa-2 | Pancreatic cancer | 6.65 ± 0.70 |
| Panc-1 | Pancreatic cancer | 15.5 ± 2.93 |
| SW 1990 | Pancreatic cancer | 5.40 ± 0.78 |
| MKN-45 | Gastric cancer | 10.8 ± 1.14 |
| HT-29 | Colon cancer | 7.13 ± 1.14 |
| LoVo | Colon cancer | 5.66 ± 0.56 |
| CCD1140Sk | Fibroblast | 1.09 ± 0.16 |
| HFL-1 | Fibroblast | 1.02 ± 0.21 |
| WI-38 | Fibroblast | 1.00 |

a Relative to the levels observed in the WI38 cell line.
